# Supplementary material
Source: Springer Nature journal article supplement (https://www.springermedizin.de/resource/supplementary/12890_2013_436_MOESM5_ESM.pdf/9505216)

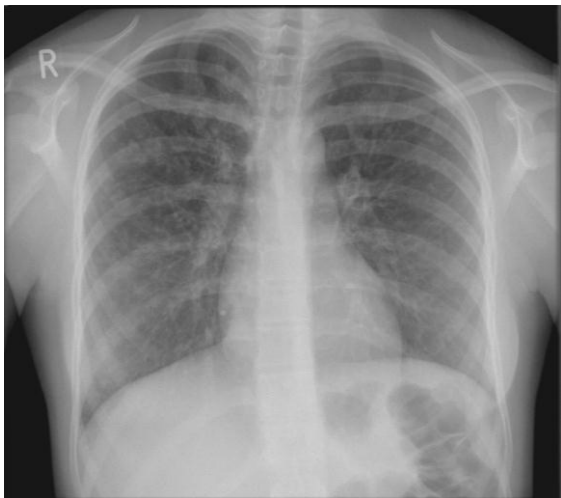

2 months after first pulmonary exacerbation

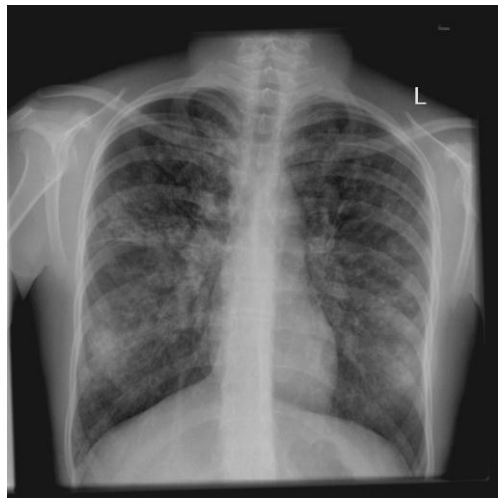

2 years after first pulmonary exacerbation

Supplement: MOESM5 [file 9505216]
